# Supplementary material for: Reproducibility and validity of food group intake in a short food frequency questionnaire for the middle-aged Japanese population
Source: Springer Nature journal article supplement (doi:10.1186/s12199-021-00951-3), 2021-03-02
Supplement: MOESM3 [file 18921116]

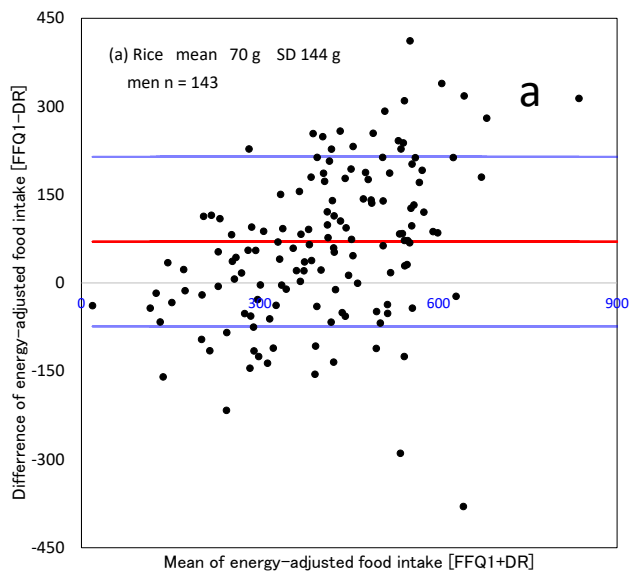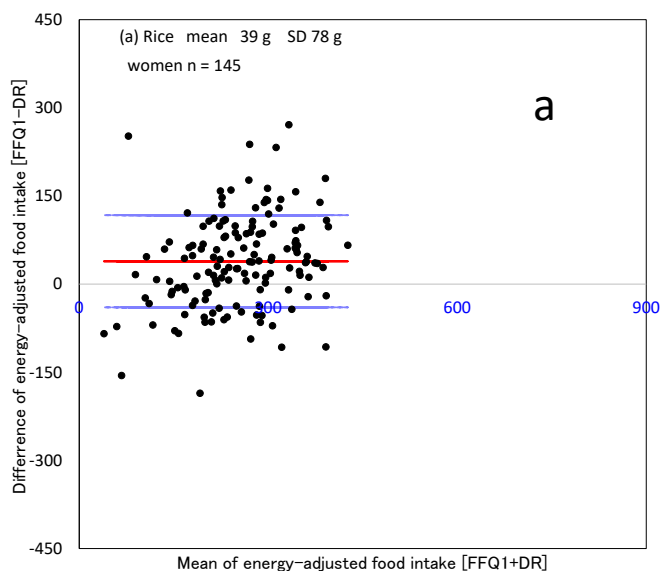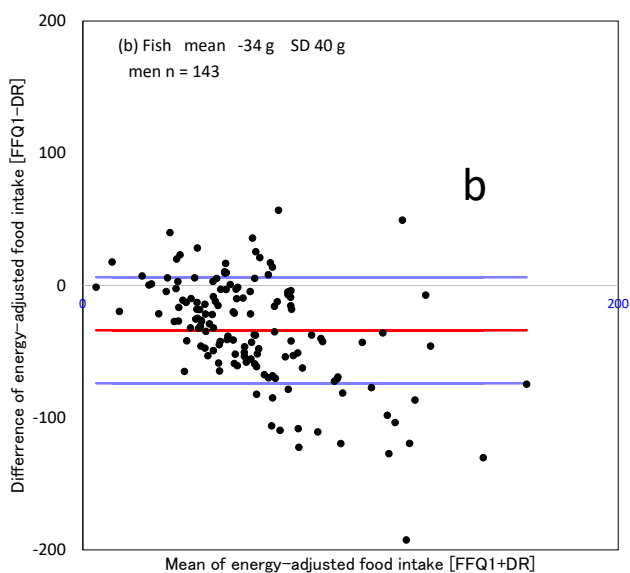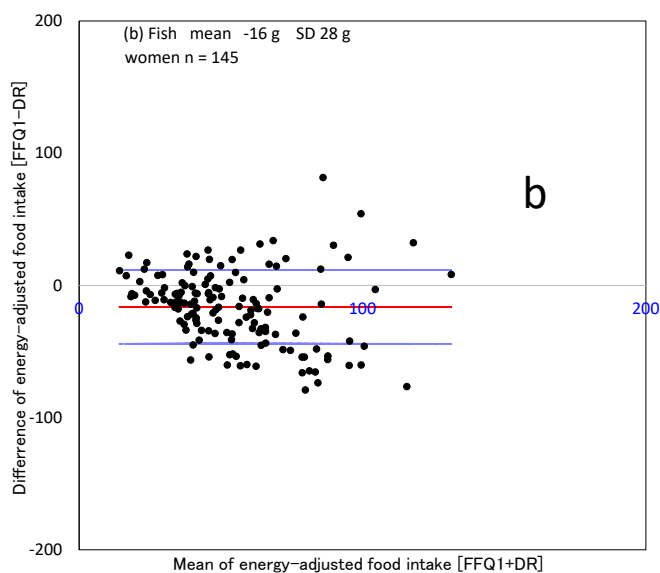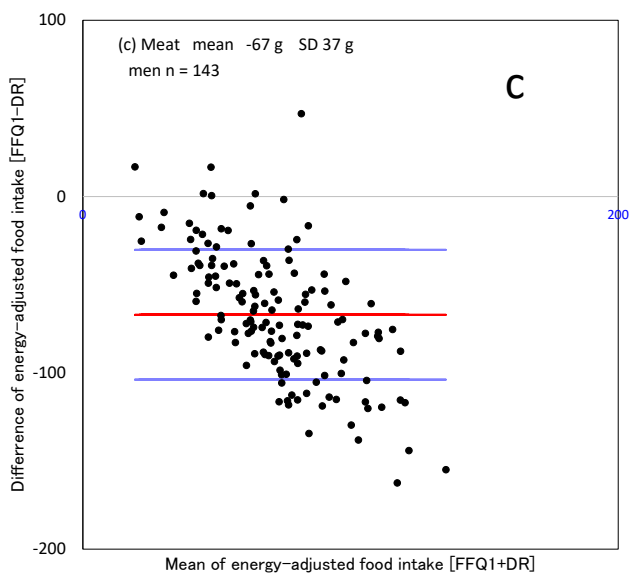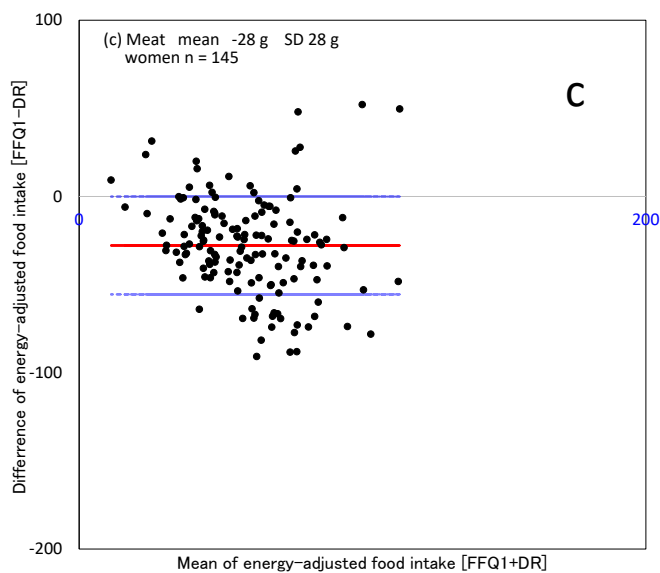

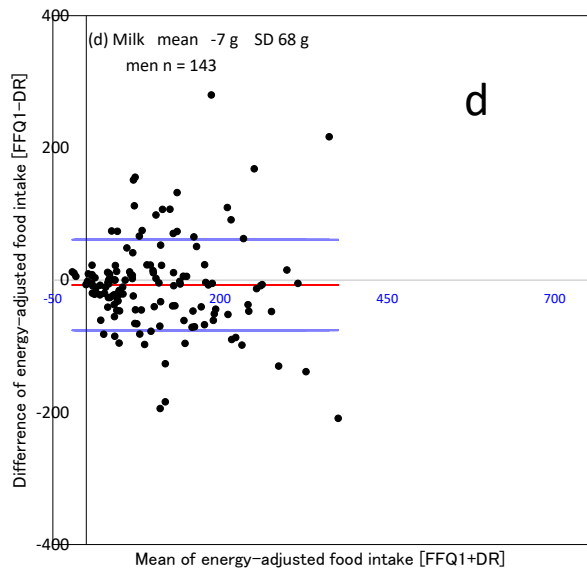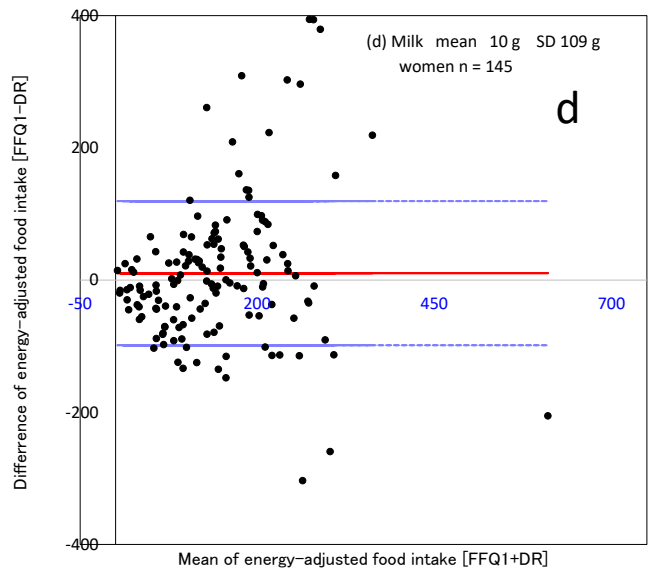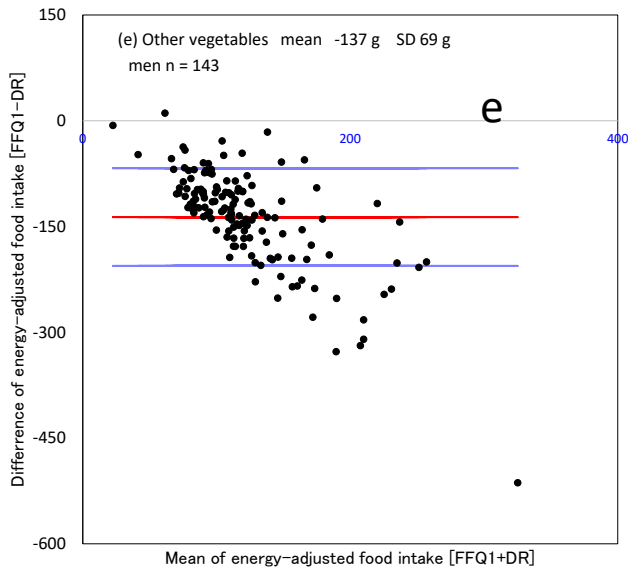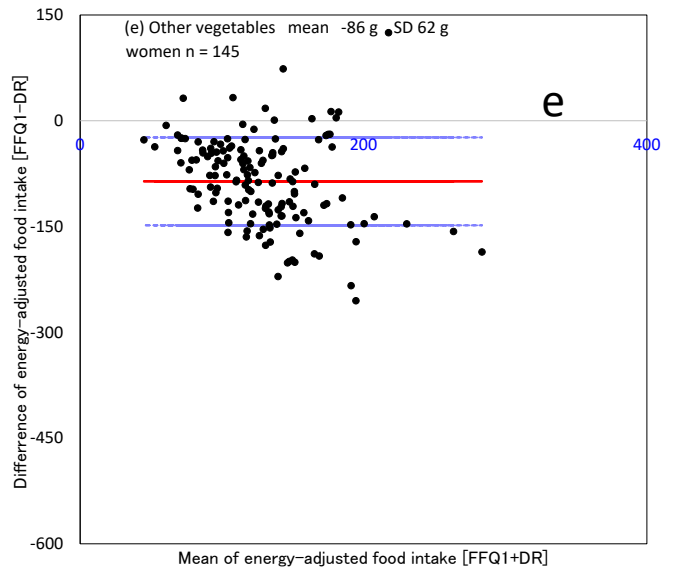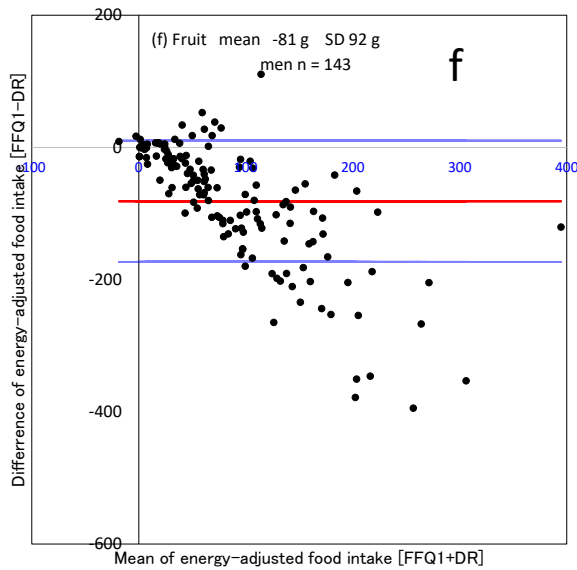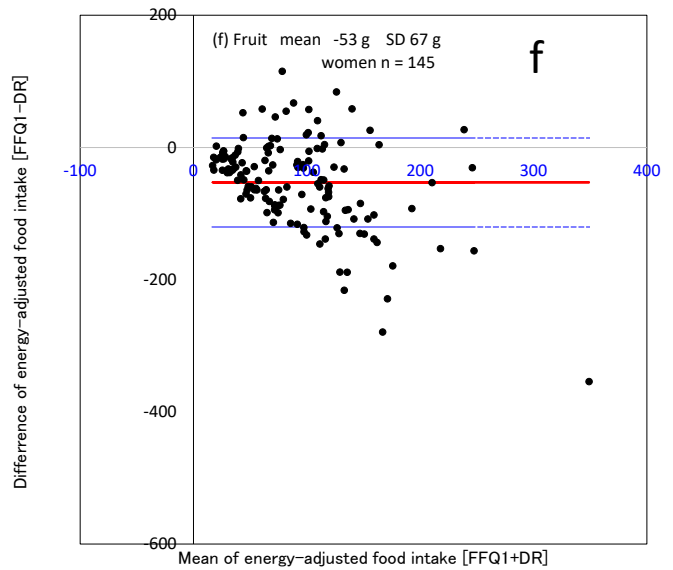

Footnote: rice (a), fish (b), meat (c), milk (d), other vegetables (e), and fruit (f), left men, right: women

Red line: mean, blue line: +/- SD

Additional file 3: Bland Altman plot graphs for the consumption of rice (a), fish (b), meat (c), milk (d) , other vegetables (e), and fruit (f) among men and women
